# Supplementary material for: Effects of three weeks base training at moderate simulated altitude with or without hypoxic residence on exercise capacity and physiological adaptations in well-trained male runners
Source: PeerJ. 2024 Mar 29;12:e17166. doi: 10.7717/peerj.17166 (PMC10984165; doi:10.7717/peerj.17166)
Supplement: Supplemental Information 1 [file peerj-12-17166-s001.xlsx]

## Sheet: blood cell data
	BL			5th			7th			14th
hihilo	RBC	HGB	HCT	RBC	HGB	HCT	RBC	HGB	HCT	RBC	HGB	HCT
1	5.21	167	0.437	3.65	115	0.298	5.07	163	0.425	5.3	168	0.454
2	5.22	161	0.442	5.02	157	0.421	4.76	152	0.401	5.04	159	0.427
3	4.48	140	0.369	4.34	134	0.358	4.62	143	0.381	4.69	146	0.391
4	4.53	156	0.388	5.06	162	0.434	4.93	159	0.416	5.15	167	0.441
5	4.81	146	0.393	4.78	147	0.394	4.49	138	0.367	4.63	143	0.379
6	4.96	157	0.414	5.23	163	0.436	4.93	154	0.407	4.92	155	0.411
7	5.3	156	0.425	5.34	156	0.429	5.33	158	0.425	5.24	155	0.421
8	4.82	146	0.385	5.17	154	0.412	5.1	156	0.408	5.62	168	0.458
lohi
9	5.03	159	0.417	5.31	166	0.437	5.05	158	0.42	5.62	175	0.469
10	4.56	148	0.388	4.81	155	0.412	4.72	152	0.402	4.3	142	0.373
11	4.99	150	0.396	5	149	0.396	4.87	148	0.387	5.01	151	0.409
12	4.96	157	0.412	4.78	151	0.397	4.32	138	0.356	5.01	159	0.42
13	5.27	153	0.409	5.36	153	0.416	5.01	149	0.392	5.32	153	0.421
14	5.02	144	0.388	5.02	145	0.388	4.89	143	0.378	5.03	147	0.396
15	5.07	159	0.428	5.28	165	0.446	4.83	154	0.405	5.23	164	0.442
16	4.38	142	0.371	4.96	158	0.426	4.38	139	0.372	4.71	150	0.403
