# Supplementary material for: Effects of three weeks base training at moderate simulated altitude with or without hypoxic residence on exercise capacity and physiological adaptations in well-trained male runners
Source: PeerJ. 2024 Mar 29;12:e17166. doi: 10.7717/peerj.17166 (PMC10984165; doi:10.7717/peerj.17166)
Supplement: Supplemental Information 2 [file peerj-12-17166-s002.xlsx]

## Sheet: 240W VO2
			pre	post
HIHILO	1	1	48.63	56.34
	1	2	56.59	53.48
	1	3	48.5	52.16
	1	4	33.33	59.8
	1	5	52.81	52.45
	1	6	62.46	67.29
	1	7	62.33	69.33
	1	8	61.79	56.63
LOHI	2	9	55.6	53.78
	2	10	61.98	61.69
	2	11	54.79	51.89
	2	12	56.65	61.74
	2	13	50.54	59.14
	2	14	43.3	59.6
	2	15	65.35	55.84
	2	16	63.6	63.11

## Sheet: VO2max
Lowest EIAH				VO2max
LoHi	pre	post		pre	post
1	88.05	97.63		62	59.6
2	88.12	92.4		74.1	76.8
3	89.9	90.67		74.5	68.3
4	93.73	92.78		66.7	76.6
5	93.05	88.14		61.8	63.6
6	94.02	94.38		55.6	56.1
7	85.61	93		67.2	57.2
8	91.96	92.07		71.1	71.3
HiHiLo
9	88.37	96.58		64.4	73
10	87.73	83.47		56.5	60.2
11	90.05	91.16		70	73.2
12	91.82	91.64		73.1	65.2
13	87.3	84.29		66.2	71.1
14	93.72	91		57.9	61.5
15	86.19	94.2		68.2	64.6
16	93.68	92.08		59.2	60.8

## Sheet: 240w SPO2
				240w	SpO2 lowest	3min SpO2 average
	BL	PRE					POST					LoHi
watt
name/time	0'	13'	14'	15'			13'	14'	15'
1	98	93	88.05	95.58	88.05	92.21	98	97.63		97.63	97.815
2	98.5	95.58	95.91	97.27	95.58	96.2533	96.35	97.9	96	96	96.75
3	98	95.63	96.1	95.68	95.63	95.8033	94.56	94.81	94.7	94.56	94.69
4	98	97.15	96.27	95.77	95.77	96.3967	97.25	97.07	97	97	97.1067
5	99	93.15	93.05		93.05	93.1	95.67	93.33	91.98	91.98	93.66
6	98.5	94.02			94.02	94.02	94.98	94.75	94.38	94.38	94.7033
7	98	95.11	91.92	91.04	91.04	92.69	96.92	94.52	93	93	94.8133
8	98	96	96.33	97.22	96	96.5167	98.07	97.07	92.19	92.19	95.7767
										均
										sd
9	98.5	96.09	95.47	89.97	89.97	93.8433	98.1	98	98.08	98	98.06	HiHiLo
10	97	96.8	92.39	87.73	87.73	92.3067	98.12	97.02	97.48	97.02	97.54
11	98	96.07	96.79	95.88	95.88	96.2467	96.57	96.15	95.57	95.57	96.0967
12	98.5	92.58	92.75	92.12	92.12	92.4833	97.95	98	98.02	97.95	97.99
13	98.5	90.1	87.3	89.22	87.3	88.8733	92.82	84.29	88.6	84.29	88.57
14	98.5	93.72			93.72	93.72	92.78	91		91	91.89
15	98	95.35	94.55	86.19	86.19	92.03	98	98	97.36	97.36	97.7867
16	98.5	96.05	95.87	95.97	95.87	95.9633	96.92	94.2	94.53	94.2	95.2167

## Sheet: EIAH LOAD
pre	mild EIAH min	medium EIAH min	LOAD w	post	mild EIAH	medium EIAH	load when EIAH	group
	12	13	210				240	1	HIHILO
	17	18	270		19	19	300	1
	16	19	240		12	19	210	1
	16		255		18	20	270	1
	9	14	180		12	15	210	1
	11		210		10		210	1
	13	14	240		14	15	240	1
	17	18	270		15	15	240	1
	15	15	240				270	2	LOHI
	14	14	240		16	17	270	2
	18	19	270		17	20	270	2
	8	13	180		17	17	270	2
	10	13	210		9	13	180	2
	10		210		11	13	210	2
	14	15	240		18		270	2
	17		240		14	17	240	2
