# Supplementary material for: Effects of three weeks base training at moderate simulated altitude with or without hypoxic residence on exercise capacity and physiological adaptations in well-trained male runners
Source: PeerJ. 2024 Mar 29;12:e17166. doi: 10.7717/peerj.17166 (PMC10984165; doi:10.7717/peerj.17166)
Supplement: Supplemental Information 3 [file peerj-12-17166-s003.xlsx]

## Sheet: 5000m time
HiHiLo	pre	post				LoHi	pre	post
1	16'57"	16'30"				9	21'2"	19'48"
2	15'34"	15'43"				10	15'35"	15'47"
3	17'17"	17'29"				11	15'8"	15'2"
4	16'59"	16'38"				12	14'55"	14'53"
5	18'34"	17'30"				13	16'47"	18'10"
6	17'25"	16'34"				14	20'42"	18'15"
7	17'20"	17'5"				15	18'33"	19'50"
8	18'16"	17'20"				16	16'27"	16'16"

## Sheet: retic
BL	#Retic	#CHr	#CHm	%Retic	%L Retic	%M Retic	%H Retic	1st	#Retic	#CHr	#CHm	%Retic	%L Retic	%M Retic	%H Retic	5th	#Retic	#CHr	#CHm	%Retic	%L Retic	%M Retic	%H Retic	7th	#Retic	#CHr	#CHm	%Retic	%L Retic	%M Retic	%H Retic	14th	#Retic	#CHr	#CHm	%Retic	%L Retic	%M Retic	%H Retic
HiHiLo
1	0.052	37.8	35.4	1.02	92.57	6.58	0.85		0.073	36.5	35.4	1.44	92.36	6.67	0.98		0.079	37.6	35.6	1.64	90.16	8.54	1.3		0.065	37.2	35.3	1.32	89.82	8.93	1.25		0.068	37.1	35.4	1.35	94.49	4.99	0.52
2	0.054	40.2	35.5	1.24	92.08	7.33	0.59		0.073	39.1	36.1	1.54	88.73	10.79	0.48		0.083	38.1	36.2	1.72	89.24	10.35	0.41		0.061	39	36.1	1.29	87.27	11.8	0.94		0.076	37.6	35.6	1.53	89.33	10.21	0.46
3	0.038	37.1	33.6	0.88	93.66	6.05	0.29		0.059	35.9	33.8	1.42	91.21	8.22	0.56		0.068	35.5	33.8	1.54	92.55	6.46	0.99		0.066	35.2	33.8	1.66	89.2	9.95	0.83		0.085	33.3	33.7	1.98	91.86	7.74	0.4
4	0.061	37.3	35.3	1.31	93.15	5.95	0.9		0.076	37.4	35.5	1.55	89.94	9.29	0.77		0.07	36.3	35.7	1.52	92.07	7.12	0.81		0.072	36.9	35.2	1.6	90.55	8.98	0.47		0.066	37.3	35.4	1.41	91.58	7.89	0.53
5	0.045	36.8	33.6	0.91	88.21	9.74	2.05		0.065	38.2	33.6	1.42	90.94	8.05	1.01		0.083	37.1	33.7	1.68	89.85	9.74	0.41		0.059	37.3	33.6	1.22	92.19	7.03	0.78		0.066	37.6	34.1	1.34	93.33	5.79	0.88
6	0.044	36.9	34.3	1.07	90.93	8.09	0.98		0.067	37	34.5	1.5	88.12	11.06	0.83		0.068	37.3	34.2	1.6	93.18	6.32	0.5		0.058	36.9	34	1.38	94.63	4.99	0.38		0.065	36	34.3	1.5	93.14	5.66	1.2
7	0.045	34.9	32.5	0.9	95.37	3.86	0.77		0.046	35.9	32.7	0.92	93.17	6.1	0.73		0.073	36.2	32.9	1.51	93.34	6.34	0.32		0.059	34.9	32.7	1.17	95.27	4.14	0.59		0.048	36.1	33.2	0.96	94.9	4.85	0.24
8	0.055	37.1	35.6	1.14	87.82	11.38	0.8		0.091	38.8	35.7	1.86	89.15	10.34	0.52		0.11	38.7	35.4	2.34	90.02	9.06	0.92		0.07	36.8	35.5	1.46	92.54	6.98	0.48		0.076	37.6	35.6	1.53	89.33	10.21	0.46
BL	#Retic	#CHr	#CHm	%Retic	%L Retic	%M Retic	%H Retic	1st	#Retic	#CHr	#CHm	%Retic	%L Retic	%M Retic	%H Retic	5th	#Retic	#CHr	#CHm	%Retic	%L Retic	%M Retic	%H Retic	7th	#Retic	#CHr	#CHm	%Retic	%L Retic	%M Retic	%H Retic	14th	#Retic	#CHr	#CHm	%Retic	%L Retic	%M Retic	%H Retic
LoHi
9	0.043	37.6	35	0.83	96.54	2.93	0.53		0.052	38	35	1.07	91.03	7.88	1.09		0.054	37.9	35.4	1.16	90.93	8.25	0.82		0.065	38	35	1.3	93.29	6.36	0.35		0.079	38	34.9	1.84	89.92	9.24	0.84
10	0.075	36.4	34.9	1.66	87.37	11.74	0.89		0.1	37.2	35	2.21	85.92	13.07	1.01		0.08	37.2	35.4	1.76	91.7	7.75	0.55		0.095	37.2	34.7	2.11	85.08	13.37	1.55		0.082	38.1	34.9	1.91	89.92	9.68	0.4
11	0.046	37.8	35.3	1.01	92.98	7.02	0		0.061	37.6	35.2	1.25	91.73	8.08	0.19		0.091	37.5	35.4	1.81	92.88	6.87	0.25		0.067	38.1	35.3	1.36	92.26	7.24	0.51		0.065	38.4	35.4	1.3	96.6	3.22	0.18
12	0.055	36.4	35.5	1.36	90.68	8.54	0.78		0.061	38.1	35.7	1.58	90.91	8.12	0.97		0.062	37.7	35.7	1.43	95.41	3.88	0.71		0.061	36	35.3	1.41	90.96	8.32	0.72		0.068	37.2	35.6	1.65	92.79	6.73	0.48
13	0.047	35.7	32.4	0.95	93.81	5.45	0.74		0.048	35.7	32.3	0.95	94.54	4.99	0.48		0.05	36	32.4	1.08	93.47	5.41	1.13		0.053	36.7	32.4	1.06	94.95	3.58	1.47		0.065	36.1	32.4	1.35	93.95	5.34	0.71
14	0.048	36.1	32	1.04	94.95	4.57	0.48		0.047	36	32.3	0.99	94.58	4.48	0.94		0.066	36.5	32.1	1.32	95.71	3.26	1.03		0.036	36.4	32	0.74	94.14	4.32	1.54		0.038	36.3	32.1	0.76	94.72	3.73	1.55
15	0.041	38.4	33.9	0.85	90.79	7.86	1.36		0.055	37.7	33.7	1.19	93.65	5.95	0.4		0.05	37.4	33.7	1.1	94.39	4.93	0.67		0.045	36.7	33.5	0.92	96.19	3.05	0.76		0.035	37	33.9	0.76	97.09	2.59	0.32
16	0.048	39.3	35.9	1.09	94.5	4.36	1.15		0.072	39.1	35.9	1.54	94.31	5.04	0.65		0.072	39.2	36.1	1.59	94.2	5.17	0.63		0.051	39.4	36.1	1.21	91.37	8.41	0.22		0.057	39.4	36.5	1.32	95.09	4.52	0.39
