# Supplementary material for: Effects of three weeks base training at moderate simulated altitude with or without hypoxic residence on exercise capacity and physiological adaptations in well-trained male runners
Source: PeerJ. 2024 Mar 29;12:e17166. doi: 10.7717/peerj.17166 (PMC10984165; doi:10.7717/peerj.17166)
Supplement: Supplemental Information 4 [file peerj-12-17166-s004.xlsx]

## Sheet: HRVtime domain pre
	exercise							rest1							rest2							rest3							rest4
	Mean RR*(s）	STD(s）	Mean HR*（1/min）	STD（1/min）	RMSSD（ms）	NN50（count）	pNN50（%）	Mean RR*(s）	STD(s）	Mean HR*（1/min）	STD（1/min）	RMSSD（ms）	NN50（count）	pNN50（%）	Mean RR*(s）	STD(s）	Mean HR*（1/min）	STD（1/min）	RMSSD（ms）	NN50（count）	pNN50（%）	Mean RR*(s）	STD(s）	Mean HR*（1/min）	STD（1/min）	RMSSD（ms）	NN50（count）	pNN50（%）	Mean RR*(s）	STD(s）	Mean HR*（1/min）	STD（1/min）	RMSSD（ms）	NN50（count）	pNN50（%）
HiHiLo
1	0.346	0.005	174.03	2.83	5.5	0	0	0.36	0.005	167.34	2.03	4.8	0	0	0.453	0.007	132.89	2.02	4.5	0	0	0.484	0.011	124.07	2.88	4	0	0	0.525	0.008	114.41	1.86	3.5	0	0
2	0.317	0.004	189.76	1.66	1.9	0	0	0.345	0.004	174.89	1.68	2.9	0	0	0.454	0.005	132.79	1.52	5.4	0	0	0.52	0.006	115.49	1.48	7.7	0	0	0.54	0.007	111.06	1.56	7.2	0	0
3	0.333	0.014	183.57	3.34	4.2	0	0	0.497	0.004	120.79	1.02	2.6	0	0	0.522	0.005	114.86	1.17	2.4	0	0	0.533	0.004	112.65	1	2.9	0	0	0.535	0.007	112.23	1.44	4.4	0	0
4	0.334	0.004	179.96	2.14	3.5	0	0	0.356	0.004	169.13	1.82	3.5	0	0	0.412	0.004	145.93	1.21	4.1	0	0	0.465	0.009	129.37	2.42	3.3	0	0	0.525	0.007	114.38	1.5	3.5	0	0
5	0.324	0.003	185.58	1.74	2.5	0	0	0.333	0.002	180.28	1.68	3	0	0	0.387	0.003	155.2	1.41	4	0	0	0.427	0.003	140.48	1.11	2.3	0	0	0.437	0.003	137.35	0.67	3	0	0
6	0.345	0.009	174.87	2.92	4.7	1	0	0.357	0.006	168.77	1.62	6.1	1	0.6	0.47	0.006	128.22	1.85	6.5	0	0	0.544	0.007	110.32	1.5	5.3	0	0	0.562	0.006	106.85	1.13	4.8	0	0
7	0.317	0.004	189.67	2.02	2.6	0	0	0.341	0.004	176.94	2.44	3.8	0	0	0.423	0.005	142.29	1.72	2.6	0	0	0.459	0.004	130.76	1.3	2.7	0	0	0.469	0.004	127.84	1.1	2.7	0	0
8	0.329	0.006	182.85	2.9	4.4	0	0	0.477	0.053	131.21	9.36	19.5	6	4.8	0.367	0.005	163.47	2.28	5.8	0	0	0.348	0.003	172.32	2.18	3.9	0	0	0.34	0.005	176.29	2.99	5.8	0	0
LoHi
9	0.403	0.008	149.76	2.65	4.9	0	0	0.425	0.007	142.29	2.3	4.7	0	0	0.546	0.019	110.47	3.67	9.6	0	0	0.668	0.047	90.3	6.34	21	4	4.5	0.666	0.045	90.66	6.18	22.1	3	3.4
10	0.378	0.011	163.53	4	7.2	5	0.2	0.373	0.006	161.46	2.3	6.4	0	0	0.473	0.008	127.1	2.38	7.2	0	0	0.504	0.009	119.24	2.25	6.6	0	0	0.48	0.004	125.05	1.09	4.6	0	0
11	0.326	0.004	184.39	2.43	3.3	0	0	0.333	0.002	180.28	1.68	3	0	0	0.387	0.003	155.2	1.41	4	0	0	0.427	0.003	140.48	1.11	2.3	0	0	0.437	0.003	137.35	0.67	3	0	0
12	0.323	0.011	187.1	2.87	3.4	0	0	0.351	0.003	172.54	1.54	3.7	0	0	0.459	0.005	131.32	1.88	4.9	0	0	0.512	0.003	117.26	0.72	3.5	0	0	0.527	0.005	113.88	1.09	2.5	0	0
13	0.373	0.015	167.57	5.02	13	17	0.6	0.339	0.011	177.74	5.73	10.2	1	0.6	0.406	0.006	148.12	1.97	3.8	0	0	0.449	0.006	133.65	1.75	2.6	0	0	0.442	0.007	135.92	2.17	3.3	0	0
14	0.315	0.003	191	1.93	2.7	0	0	0.313	0.002	191.76	1.58	1.9	0	0	0.359	0.002	167.39	0.99	2.1	0	0	0.405	0.002	148.34	0.9	1.9	0	0	0.427	0.003	140.56	1.05	2.4	0	0
15	0.368	0.003	163.31	1.15	2	0	0	0.373	0.003	161.22	1.27	3.1	0	0	0.453	0.005	132.68	1.5	2.5	0	0	0.506	0.005	118.62	1.25	2.2	0	0	0.528	0.005	113.56	1.11	2.7	0	0
16	0.323	0.005	186.46	2.99	4.1	0	0	0.336	0.004	178.99	2.17	3.8	0	0	0.42	0.005	143.08	1.79	3.2	0	0	0.464	0.005	129.36	1.48	3.1	0	0	0.471	0.005	127.38	1.4	3	0	0

## Sheet: HRVtime domain post
	exercise							rest1							rest2							rest3							rest4
	Mean RR*(s）	STD(s）	Mean HR*（1/min）	STD（1/min）	RMSSD（ms）	NN50（count）	pNN50（%）	Mean RR*(s）	STD(s）	Mean HR*（1/min）	STD（1/min）	RMSSD（ms）	NN50（count）	pNN50（%）	Mean RR*(s）	STD(s）	Mean HR*（1/min）	STD（1/min）	RMSSD（ms）	NN50（count）	pNN50（%）	Mean RR*(s）	STD(s）	Mean HR*（1/min）	STD（1/min）	RMSSD（ms）	NN50（count）	pNN50（%）	Mean RR*(s）	STD(s）	Mean HR*（1/min）	STD（1/min）	RMSSD（ms）	NN50（count）	pNN50（%）
HiHiLo
1	0.348	0.005	173.16	2.07	3.5	0	0	0.357	0.003	168.54	1.43	2.8	0	0	0.436	0.004	138.19	1.34	3.1	0	0	0.456	0.006	132.18	1.62	4.4	0	0	0.462	0.007	130	2.04	6.5	0	0
2	0.318	0.017	189.06	8.65	8	0	0	0.353	0.003	170.79	1.93	4.2	0	0	0.465	0.007	129.55	2.1	8.4	0	0	0.533	0.007	112.62	1.76	9.6	0	0	0.525	0.009	114.41	1.95	6.4	0	0
3	0.336	0.005	178.67	2.46	3.7	0	0	0.382	0.004	157.82	1.28	2.9	0	0	0.47	0.005	127.86	1.46	3.9	0	0	0.512	0.009	117.2	2.11	6.5	0	0	0.512	0.009	117.2	2.11	6.5	0	0
4	0.337	0.004	178.54	2.1	3.7	0	0	0.369	0.003	162.97	1.38	2.9	0	0	0.422	0.006	142.22	1.92	3.6	0	0	0.427	0.004	140.61	1.37	4.6	0	0	0.451	0.008	133.52	2.14	4.1	0	0
5	0.341	0.005	176.67	2.58	3.9	0	0	0.363	0.003	165.65	1.53	3.6	0	0	0.415	0.007	144.78	1.97	6.1	0	0	0.42	0.003	142.71	1.33	4.4	0	0	0.446	0.005	134.79	1.34	4.7	0	0
6	0.345	0.005	174.52	2.47	4.8	0	0	0.36	0.004	167.51	2.17	4.7	0	0	0.441	0.01	136.56	2.78	4.6	0	0	0.496	0.012	121.33	2.87	4.9	0	0	0.49	0.008	122.5	2.04	6	0	0
7	0.329	0.004	182.37	2.63	4.5	0	0	0.366	0.006	165.25	2.43	4.6	0	0	0.457	0.009	131.62	2.55	5.2	0	0	0.444	0.009	135.27	2.52	4.8	0	0	0.478	0.005	125.89	1.23	4.7	0	0
8	0.338	0.005	177.8	2.79	5.3	0	0	0.366	0.004	164.75	2.45	5.4	0	0	0.446	0.006	134.83	1.87	8.1	1	0.7	0.497	0.006	120.74	1.68	4.6	0	0	0.524	0.006	114.58	1.52	7.3	0	0
LoHi
9	0.359	0.005	167.29	2.23	3.3	0	0	0.358	0.005	168.52	2.4	4.1	0	0	0.442	0.008	136.31	2.54	5.1	0	0	0.535	0.033	113.29	6.51	14.7	2	1.8	0.536	0.029	113.64	5.69	12.3	1	0.9
10	0.334	0.007	180	4.03	5.9	0	0	0.383	0.006	157.88	2.61	6.5	0	0	0.483	0.009	124.73	2.24	10.8	1	0.8	0.52	0.008	115.42	1.85	7.2	0	0	0.554	0.012	108.64	2.38	8.6	0	0
11	0.319	0.003	188.3	2.21	3	0	0	0.319	0.003	188.3	2.21	3	0	0	0.417	0.003	144.2	1.14	2.4	0	0	0.448	0.004	134.06	1.32	2.5	0	0	0.469	0.007	128.01	1.85	2.5	0	0
12	0.308	0.007	195.11	3.57	4.4	0	0	0.345	0.003	175.2	1.43	3	0	0	0.441	0.005	136.55	2.34	8.2	0	0	0.491	0.004	122.32	0.99	4.1	0	0	0.509	0.004	117.81	0.98	3.2	0	0
13	0.354	0.003	169.5	1.77	3.3	0	0	0.358	0.005	168.52	2.4	4.1	0	0	0.442	0.008	136.31	2.54	5.1	0	0	0.535	0.033	113.29	6.51	14.7	2	1.8	0.536	0.029	113.64	5.69	12.3	1	0.9
14	0.333	0.003	180.55	1.61	2.4	0	0	0.335	0.004	179.83	1.94	2.5	0	0	0.402	0.003	149.62	1.18	2.1	0	0	0.464	0.006	129.3	1.56	2.3	0	0	0.496	0.011	120.96	2.74	3.3	0	0
15	0.354	0.003	169.52	1.59	3.1	0	0	0.388	0.005	155.7	1.93	2.5	0	0	0.477	0.007	125.98	1.78	3.4	0	0	0.524	0.005	114.49	1.2	3	0	0	0.549	0.008	109.37	1.59	3.6	0	0
16	0.327	0.006	184.01	3.32	5.5	0	0	0.351	0.005	171.9	1.97	4	0	0	0.448	0.006	134.44	2.06	6.5	0	0	0.492	0.008	121.97	1.96	7.9	0	0	0.549	0.012	109.31	2.41	4.9	0	0
																																													time

## Sheet: HRVfrequency-domain pre 
	exercise																rest1																rest2																rest3
	VLF				LF				HF				LF/HF				VLF				LF				HF				LF/HF				VLF				LF				HF				LF/HF				VLF
	Peak(Hz)	Power(ms2)	Power(%)	Power(n.u.）	Peak(Hz)	Power(ms2)	Power(%)	Power(n.u.）	Peak(Hz)	Power(ms2)	Power(%)	Power(n.u.）	Peak(Hz)	Power(ms2)	Power(%)	Power(n.u.）	Peak(Hz)	Power(ms2)	Power(%)	Power(n.u.）	Peak(Hz)	Power(ms2)	Power(%)	Power(n.u.）	Peak(Hz)	Power(ms2)	Power(%)	Power(n.u.）	Peak(Hz)	Power(ms2)	Power(%)	Power(n.u.）	Peak(Hz)	Power(ms2)	Power(%)	Power(n.u.）	Peak(Hz)	Power(ms2)	Power(%)	Power(n.u.）	Peak(Hz)	Power(ms2)	Power(%)	Power(n.u.）	Peak(Hz)	Power(ms2)	Power(%)	Power(n.u.）	Peak(Hz)
HiHiLo
1	0.0137	11	92.1		0	0	0	0	0.3594	1	7.9	8.5			0		0	0	0		0.0508	3	89	35.8	0.1992	0	11	4.4			8.132		0	13	58.8		0.1113	8	37.8	69.2	0.2637	1	3.4	6.2			11.221		0.0234
2	0.0176	20	98.4		0	0	0	0	0.3789	0	1.6	19.8			0		0.0234	7	98.7		0	0	0	0	0.3516	0	1.3	3.7			0		0.0371	3	71		0	0	0	0	0.1641	1	29	17.6			0		0.0352
3	0.0176	127	96		0.1133	3	2.6	37	0.3203	2	1.5	21			1.763		0	0	0		0.041	3	95.6	57.1	0.2832	0	4.4	2.6			21.83		0.0313	10	98		0	0	0	0	0.1895	0	2	17.3			0		0.0176
4	0.0254	6	92.5		0	0	0	0	0.2227	0	7.5	9.1			0		0.0293	4	98		0	0	0	0	0.2891	0	2	4.2			0		0	0	0		0.0527	1	82	30.4	0.168	0	18	6.7			4.542		0.0234
5	0	1	46.6		0.1328	0	17.7	8	0.2148	0	35.7	16.1			0.495		0	0	0		0.041	1	90.4	21.2	0.3145	0	9.6	2.2			9.465		0	0	0		0.041	2	92.5	32.9	0.2598	0	7.5	2.7			12.361		0
6	0	55	86.7		0.084	6	10.3	44.7	0.2168	2	3	13.2			3.395		0	3	90.3		0.1367	0	7.5	7.6	0.3359	0	2.2	2.3			3.365		0.0371	5	68.5		0.1426	2	19.4	16	0.2988	1	12	9.9			1.619		0
7	0.0156	12	95.5		0	0	0	0	0.3398	1	4.5	17.1			0		0	0	0		0.043	4	92.4	50.7	0.1719	0	7.6	4.2			12.113		0	0	0.5		0.0605	10	92.5	83.4	0.1777	1	7.1	6.4			13.097		0
8	0	13	89		0	0	0	0	0.2109	2	11	21.5			0		0	0	0		0.0508	1508	96.6	93.6	0.1934	53	3.4	3.3			28.339		0	0	0		0.0449	2	68.7	17.7	0.3945	1	31.3	8.1			2.193		0
LoHi
9	0.0254	23	88.6		0	0	0	0	0.3027	3	11.4	29.5			0		0	5	28.7		0.0918	11	64.9	66.1	0.3281	1	6.4	6.5			10.132		0	0	0		0.0547	128	97.8	76.5	0.2754	3	2.2	1.7			45.457		0
10	0.0273	271	98.8		0	0	0	0	0.3027	3	1.2	20.3			0		0.0215	4	91.7		0	0	0	0	0.2012	0	8.3	5.2			0		0	0	0		0.043	15	90.2	52.6	0.3047	2	9.8	5.7			9.226		0
11	0.0215	7	81.6		0	0	0	0	0.3906	1	18.4	30.9			0		0	0	0		0.041	1	90.4	21.2	0.3145	0	9.6	2.2			9.465		0	0	0		0.041	2	92.5	32.9	0.2598	0	7.5	2.7			12.361		0
12	0.0352	48	98.3		0	0	0	0	0.3789	1	1.7	4.6			0		0.0352	3	94.4		0	0	0	0	0.2266	0	5.6	6.9			0		0	0	0		0.041	5	96.1	51.1	0.3027	0	3.9	2.1			24.565		0
13	0	71	72.1		0	0	0	0	0.1953	28	27.9	32.4			0		0	0	0		0.0469	10	67.5	45.1	0.3184	5	32.5	21.7			2.073		0.0313	12	99.1		0	0	0	0	0.3828	0	0.9	4.6			0		0
14	0.0215	5	95.5		0	0	0	0	0.3574	0	4.5	7.4			0		0.0332	1	84.8		0	0	0	0	0.2676	0	15.2	8.3			0		0.0371	0	75.8		0	0	0	0	0.1797	0	24.2	10.8			0		0.0313
15	0	4	88.5		0	0	0	0	0.1836	0	11.5	−135.5			0		0	0	0.2		0.0586	1	60	21.6	0.207	1	39.8	14.3			1.509		0	1	15.7		0.0527	7	78.9	80.5	0.2266	0	5.4	5.5			14.508		0.0273
14	0	1490	99.9		0	0	0	0	0.373	2	0.1	−0.1			0		0.0332	4	92.2		0	0	0	0	0.3477	0	7.8	6.4			0		0	6	58.3		0.0703	4	35.9	58.7	0.1875	1	5.7	9.4			6.251		0
15
[truncated: 31 more columns]

## Sheet: HRV frequency domain post
	exercise																rest1																rest2																rest3
	VLF				LF				HF				LF/HF				VLF				LF				HF				LF/HF				VLF				LF				HF				LF/HF				VLF
	Peak(Hz)	Power(ms2)	Power(%)	Power(n.u.）	Peak(Hz)	Power(ms2)	Power(%)	Power(n.u.）	Peak(Hz)	Power(ms2)	Power(%)	Power(n.u.）	Peak(Hz)	Power(ms2)	Power(%)	Power(n.u.）	Peak(Hz)	Power(ms2)	Power(%)	Power(n.u.）	Peak(Hz)	Power(ms2)	Power(%)	Power(n.u.）	Peak(Hz)	Power(ms2)	Power(%)	Power(n.u.）	Peak(Hz)	Power(ms2)	Power(%)	Power(n.u.）	Peak(Hz)	Power(ms2)	Power(%)	Power(n.u.）	Peak(Hz)	Power(ms2)	Power(%)	Power(n.u.）	Peak(Hz)	Power(ms2)	Power(%)	Power(n.u.）	Peak(Hz)	Power(ms2)	Power(%)	Power(n.u.）	Peak(Hz)
HiHiLo
1	0.0195	24	96.7		0	0	0	0	0.1816	1	3.3	1			0		0	2	67.1		0.1367	1	29.2	31.6	0.2422	0	3.7	4			7.885		0	0	0		0.0586	4	76.1	52.1	0.1543	1	23.9	16.4			3.181		0.0352
2	0	8406	100		0	0	0	0	0.3633	1	0	−4.9			0		0.0371	1	86.2		0	0	0	0	0.2324	0	13.8	3.5			0		0	0	0		0.0547	11	93.2	43	0.2871	1	6.8	3.2			13.639		0
3	0.0215	11	96.5		0	0	0	0	0.3418	0	3.5	7.5			0		0.0313	4	95.9		0	0	0	0	0.2148	0	4.1	8			0		0	0	0		0.0508	9	96.8	74.9	0.2676	0	3.2	2.5			30.295		0.0234
4	0.0234	6	91		0	0	0	0	0.3477	1	9	10.9			0		0.0352	3	93.2		0	0	0	0	0.3027	0	6.8	9.6			0		0.0156	16	94.3		0.1484	1	4.1	17.3	0.3398	0	1.6	6.9			2.516		0
5	0	6	89.8		0	0	0	0	0.1855	1	10.2	12.9			0		0.0352	1	85.9		0	0	0	0	0.3047	0	14.1	5			0		0	10	98.6		0	0	0	0	0.2383	0	1.4	4			0		0.0273
6	0.0215	11	89.3		0	0	0	0	0.2852	1	10.7	15.2			0		0.0371	2	91.2		0	0	0	0	0.3398	0	8.8	3.4			0		0.0215	43	98.9		0	0	0	0	0.1777	0	1.1	8.8			0		0.0332
7	0.0313	5	92.2		0	0	0	0	0.2305	0	7.8	6			0		0.0332	13	88.6		0	0	0	0	0.1582	2	11.4	40.7			0		0.0273	25	82.1		0.1289	5	15.7	49	0.3203	1	2.2	7			6.966		0.0176
8	0	4	75.2		0	0	0	0	0.3496	1	24.8	15.2			0		0	0	0		0.0488	1	71.9	14.1	0.3613	0	28.1	5.5			2.564		0	2	36.3		0.0957	2	48.6	20.5	0.3652	1	15	6			3.235		0.0352
LoHi
9	0.0137	7	80		0	0	0	0	0.1738	2	20	31.7			0		0.0391	7	94.3		0	0	0	0	0.166	0	5.7	9			0		0	0	0		0.0664	15	47.7	41.9	0.168	16	52.3	46			0.911		0
10	0.0156	17	97		0	0	0	0	0.2324	1	3	3.7			0		0	4	59.8		0.0723	2	30.3	16.9	0.3945	1	9.9	5.5			3.067		0	18	92.3		0.0898	1	5.3	7.1	0.2832	0	2.5	3.4			2.112		0
11	0.0352	1	81.7		0	0	0	0	0.2441	0	18.3	5.4			0		0.0332	3	94.9		0	0	0	0	0.2598	0	5.1	13.3			0		0	0	0		0.041	2	84	56.2	0.168	0	16	10.7			5.256		0
12	0.0117	328	99.5		0	0	0	0	0.3945	2	0.5	20.4			0		0.0371	1	93.2		0	0	0	0	0.2285	0	6.8	3.7			0		0	0	0		0.0469	3	77.6	14.3	0.2441	1	22.4	4.1			3.461		0
13	0.0293	2	81.7		0	0	0	0	0.3477	0	18.3	11.3			0		0.0391	7	94.3		0	0	0	0	0.166	0	5.7	9			0		0	0	0		0.0664	15	47.7	41.9	0.168	16	52.3	46			0.911		0
14	0.0195	10	98.3		0	0	0	0	0.3555	0	1.7	7.6			0		0.0391	6	98.4		0.1348	0	0	0.1	0.3379	0	1.5	5.2			0.024		0.0156	0	0		0.0508	4	94	76.8	0.2324	0	6	4.9			15.629		0
15	0.0313	1	73.6		0	0	0	0	0.1875	0	26.4	10.7			0		0.0391	11	92.4		0	0	0	0	0.1621	1	7.6	39.7			0		0.0273	13	63		0.123	7	34.3	76.6	0.2344	1	2.7	6.1			12.558		0
16	0	9	87.6		0	0	0	0	0.3887	1	12.4	12.1			0		0.0234	4	95.4		0.1367	0	0.4	0.4	0.3125	0	4.2	4.6			0.096		0	0	0		0.0469	9	83.2	45.7	0.1641	2	16.8	9.2			4.95		0
[truncated: 31 more columns]
